# Supplementary material for: Contribution of Oxidative Stress Induced by Sonodynamic Therapy to the Calcium Homeostasis Imbalance Enhances Macrophage Infiltration in Glioma Cells
Source: MDPI journal article supplement (doi:10.3390/cancers14082036), 2022-04-18
Supplement: s1 [file s1]

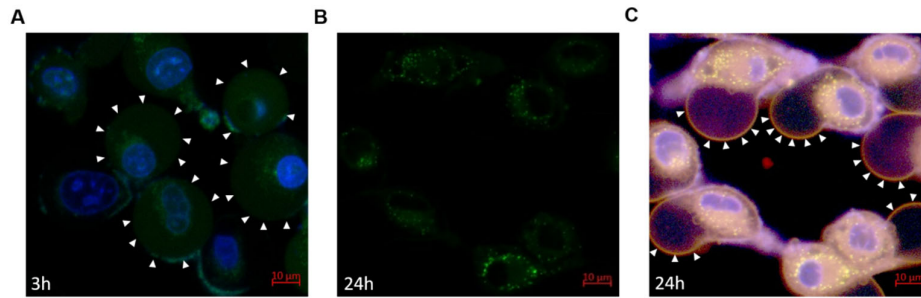

**Figure S1.** Morphological changes and  $\text{Ca}^{2+}$  staining after SDT treatment. (A) Free  $\text{Ca}^{2+}$  enters into the U251 cells, and the cell membranes become swollen (white arrow) due to the increased cell volume after 3 h. (B) Scattered distribution of intracellular  $\text{Ca}^{2+}$  after 24 h; (C) after Fig. S1 B was overexposed, the outline of the swollen cell membrane could be seen clearly (white arrow). Scale bar, 10  $\mu\text{m}$ .

FABP4-U251

15%

3h-6h

$\beta$ -actin

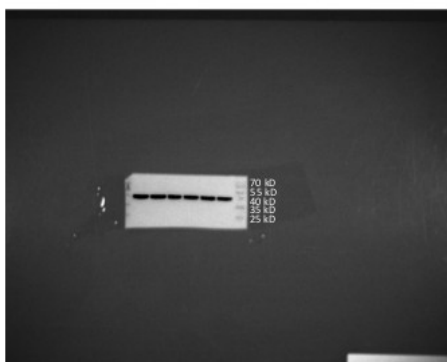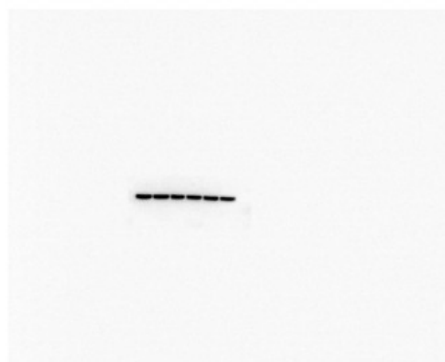

FABP4

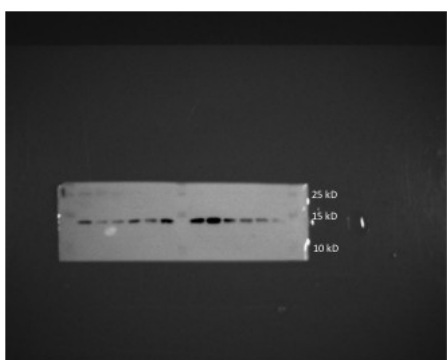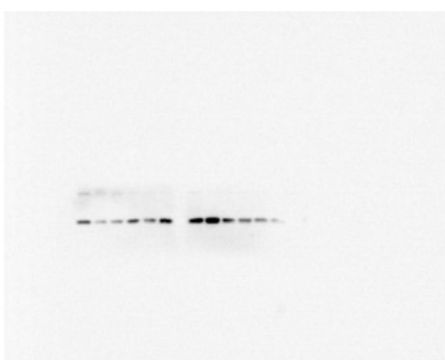

12h-24h

FABP4

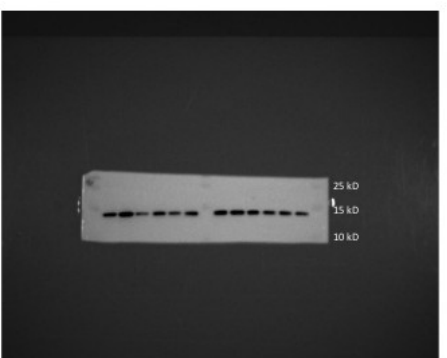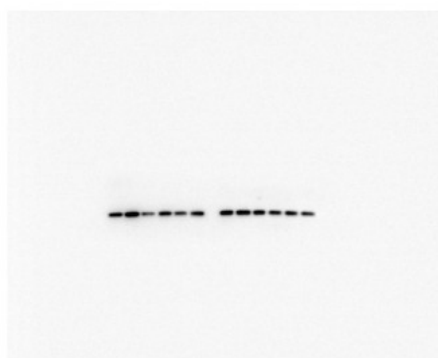

FABP4-U87

15%

3h-6h

$\beta$ -actin

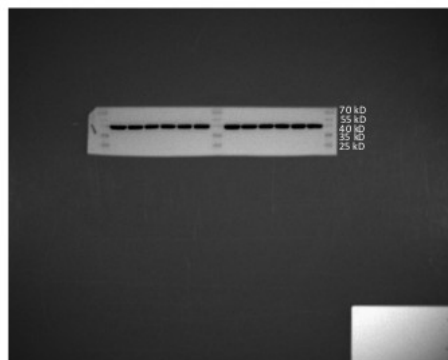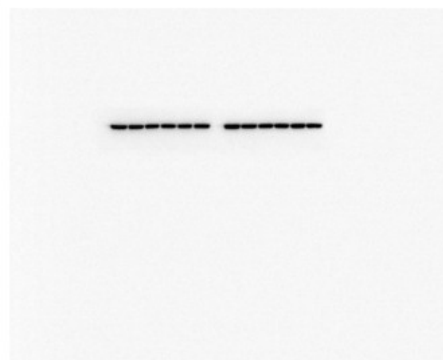

FABP4

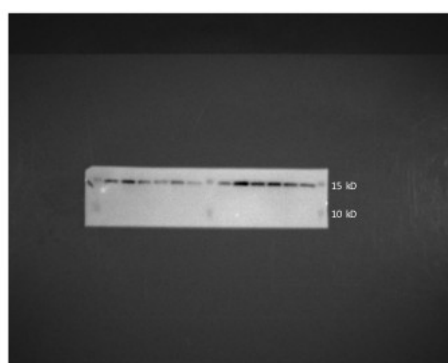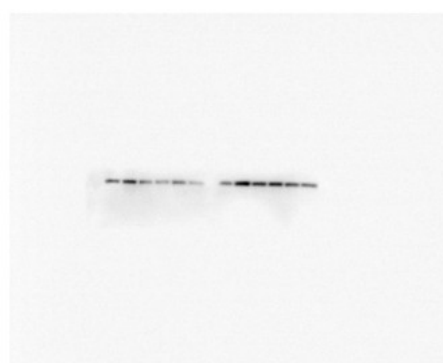

12h-24h

FABP4

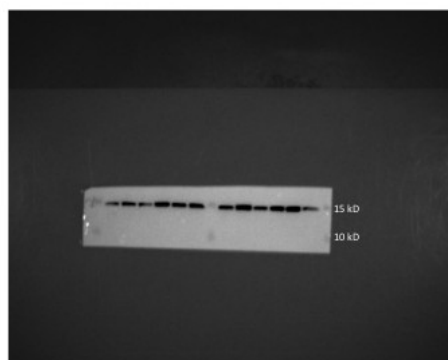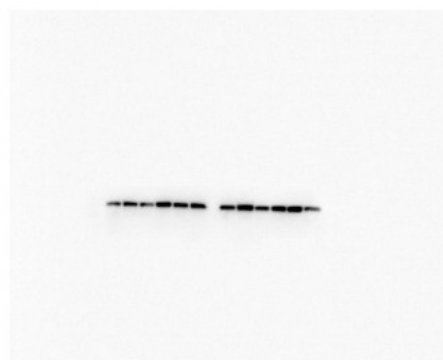

**Figure S2:** Uncropped WB figures.
